# Supplementary material for: Plasmodium cynomolgi infections in rhesus macaques display clinical and parasitological features pertinent to modelling vivax malaria pathology and relapse infections
Source: Malar J. 2016 Sep 2;15(1):451. doi: 10.1186/s12936-016-1480-6 (PMC5010691; doi:10.1186/s12936-016-1480-6)
Supplement: Supplementary file 1 — 10.1186/s12936-016-1480-6 Haematological and parasitological data of Plasmodium cynomolgi B strain infections in rhesus macaques for up to 100 days. The data used in this study are contained within this file with appropriate metadata. [file 12936_2016_1480_MOESM1_ESM.xlsx]

## Sheet: Exp_Info
Experiment number	04
Experiment description	Macaca mulatta infected with Plasmodium cynomolgi B strain
Non-human primate (NHP) host type	Macaca mulatta
Non-human primate (NHP) host identifiers	RFa14, RFv13, RIc14, RMe14, RSb14
Plasmodium species	Plasmodium cynomolgi B Strain
Anti-malaria Drugs Administered	Artemether; Chloroquine; Primaquine

## Sheet: Data
NHP_ID	Day	hgb	mcv	plt	mpv	% Reticulocytes	Reticulocytes/uL	Parasites/uL	% Parasitemia
RSb14	-1	12.8	68.6	366000	8.3	1.37795	79783.5	0	0
RSb14	1	16.2	71.1	440000	8.7	0.782014	56852.4	0	0
RSb14	2	14.4	70.5	410000	8.5	0.885827	57844.5	0	0
RSb14	3	16	71.1	510000	8	0.992063	71726.2	0	0
RSb14	4	14.3	71.8	450000	8.3	1.19641	77886.3	0	0
RSb14	5	14.2	70.7	447000	8.3	1.29482	83645.4	0	0
RSb14	6	14.9	71	531000	7.8	0.887574	60266.3	0	0
RSb14	7	14.5	70.7	468000	8.2	1.42993	94518.6	0	0
RSb14	8	15.7	70.6	484000	9.4	0.782014	55914	0	0
RSb14	9	14.8	70.1	463000	8.5	2.2977	153946	0	0
RSb14	10	14.9	71.2	455000	8.3	1.96657	133137	0	0
RSb14	11	15.1	70.5	513000	8.4	1.28332	88420.5	44.9569	0.000652495
RSb14	12	15.6	71.1	450000	8.3	2.2439	159317	216.862	0.00305439
RSb14	13	16.4	70	458000	8	1.98807	148509	525.459	0.00703426
RSb14	14	15.1	70.1	333000	8.3	2.48509	170974	5086.2	0.0739273
RSb14	15	15.3	69.7	338000	7.3	0.597015	41671.6	50976.6	0.730323
RSb14	16	14.6	69.9	246000	7.8	0.994036	66103.4	115047	1.73003
RSb14	17	14.2	70.4	200000	8.1	0.696517	45621.9	73631.6	1.12415
RSb14	18	13	69.6	226000	7.5	1.08911	65564.4	116172	1.92977
RSb14	19	14.7	68.7	128000	7.7	0.499002	33582.8	273509	4.06402
RSb14	20	13.3	68.4	137000	7.9	1.18694	73827.9	182004	2.92611
RSb14	21	11	67.6	156000	8	1.47929	76331.4	68668.1	1.33078
RSb14	22	10.6	67.7	194000	8.4	3.47826	173913	8907.46	0.178149
RSb14	23	10.5	67.6	351000	7.4	4.03458	200519	4910.56	0.098804
RSb14	24	11.7	70.1	523000	7.2	3.82353	206471	21725.3	0.40232
RSb14	25	10.3	71	452000	7.1	6.68633	320944	137417	2.86285
RSb14	26	9.3	68.8	410000	6.6	6.28518	269634	64728.1	1.50881
RSb14	27	9.1	69.2	337000	6.1	7.37787	319462	0	0
RSb14	28	9.3	69.9	357000	6.5	9.18367	405000	0	0
RSb14	29	11.2	71.1	475000	7.4	9.91168	524328	0	0
RSb14	30	11.4	70.7	485000	7.1	10.7004	574611	0	0
RSb14	31	12	70.9	553000	7.4	9.10891	519208	0	0
RSb14	32	11.8	70.2	622000	7.3	5.85899	329275	0	0
RSb14	33	11.6	69.4	629000	7.5	4.80392	268059	0	0
RSb14	34	12.3	69.7	654000	7.4	3.66442	216933	0	0
RSb14	35	12.4	68.5	535000	7.8	2.53659	151688	0	0
RSb14	36	12.1	68.6	626000	7.8	2.76134	161262	0	0
RSb14	37	13.6	68.1	595000	8	2.15475	141136	0	0
RSb14	38	13.4	68.2	615000	8.1	1.76991	115044	0	0
RSb14	39	14.7	68.4	599000	8.1	0.994036	70675.9	0	0
RSb14	40	13.7	68	530000	8.1	0.892857	59464.3	0	0
RSb14	41	13.8	68.1	479000	8.3	0.59761	39442.2	0	0
RSb14	42	13.1	68.3	457000	8.5	0.794439	51161.9	0	0
RSb14	43	14.6	68.6	505000	8.3	0.892857	63571.4	0	0
RSb14	44	14.2	68.7	498000	8.2	0.893744	61668.3	0	0
RSb14	45	14.9	68.9	478000	8.4	0.99108	71357.8	0	0
RSb14	46	15.1	69	476000	8.2	0.895522	65910.4	0	0
RSb14	47	14.2	68.7	506000	8.1	0.995025	68358.2	0	0
RSb14	48	16	69.6	491000	8.4	0.698603	53443.1	0	0
RSb14	49	15.1	68.9	486000	8.3	0.597015	43462.7	0	0
RSb14	50	16.1	69.8	468000	8.2	0.796813	61115.5	0	0
RSb14	51	16.5	68.5	506000	8.2	0.99108	78196.2	0	0
RSb14	52	17.5	68.6	502000	8.2	0.797607		0	0
RSb14	53	14.5	69	477000	8.1	0.794439	54975.2	0	0
RSb14	54	14.6	68.6	395000	8.4	0.599401	41718.3	0	0
RSb14	55	13.8	68.2	421000	8.3	0.498008	32719.1	0	0
RSb14	56	14.1	69.1	414000	8.4	0.498504	33698.9	0	0
RSb14	57	16.3	68.3	447000	8.4	0.99108	76412.3	0	0
RSb14	58	14.2	68.2	408000	8.1	0.794439	53783.5	0	0
RSb14	59	16.3	68.3	480000	8.6	0.891089	69415.8	0	0
RSb14	60	14.6	68.4	456000	8.4	0.791296	55469.8	149.867	0.00213791
RSb14	61	14.7	68.3	442000	8.3	0.696517	49104.5	169.239	0.00240056
RSb14	62	14.8	67.8	448000	8.2	0.795229	56461.2	2080.16	0.029298
RSb14	63	12.8	67	428000	7.8	0.698603	42614.8	1380.66	0.0226338
RSb14	64	14.1	67.7	374000	7.4	0.696517	47641.8	0	0
RSb14	65	15.4	67.9	458000	7.4	0.59761	44342.6	0	0
RSb14	66	14.2	67.2	429000	7.9	0.792079	53940.6	0	0
RSb14	67	14.9	67.4	456000	7.7	0.697906	50039.9	0	0
RSb14	68	14.6	67.3	417000	7.9	0.594059	41881.2	0	0
RSb14	69	14.2	67.4	533000	8	0.697211	48037.8	0	0
RSb14	70	14.4	67.3	542000	7.8	0.598205	42293.1	0	0
RSb14	71	14.3	67.7	516000	7.8	0.693069	47613.9	0	0
RSb14	72	15	67.4	517000	8.2	0.59761	43266.9	0	0
RSb14	73	15.6	67.3	548000	8.1	0.498504	36939.2	0	0
RSb14	74	14.5	67	504000	8	0.597015	42029.9	0	0
RSb14	75	14.7	66.8	481000	8	0.4995	35814.2	0	0
RSb14	76	12.9	65.8	437000	8	0.59761	37649.4	0	0
RSb14	77	13.9	66.2	436000	8.5	0.598205	40678	0	0
RSb14	78	16.5	67	523000	8.2	0.699301	55944.1	0	0
RSb14	79	14.1	65.9	482000	8.2	0.59761	41175.3	0	0
RSb14	80	14.6	66.9	489000	8	0.79602	56119.4	0	0
RSb14	81	14.9	66.3	484000	8.1	0.598802	43173.7	0	0
RSb14	82	15.4	66.4	464000	8.3	0.594059	44495	0	0
RSb14	83	14.3	66.9	458000	8.1	0.796813	55617.5	0	0
RSb14	84	13.7	66.4	460000	7.9	0.696517	46597	0	0
RSb14	85	14	66.1	473000	7.9	0.697211	47549.8	0	0
RSb14	86	14.8	65.6	433000	8.2	0.598205	42711.9	0	0
RSb14	87	14.8	66.3	447000	8.3	0.695134	50188.7	0	0
RSb14	88	15	66.4	432000	8.3	0.79602	57711.4	38.5085	0.000531151
RSb14	89	15.7	65.8	426000	8.5	0.695134	52621.6	158.62	0.00209537
RSb14	90	15.6	65.7	441000	8.5	0.499002	37974.1	575.247	0.0075591
RSb14	91	13.1	64.8	386000	8.3	0.397614	25526.8	593.473	0.00924413
RSb14	92	15.5	65.6	392000	8	0.39604	30099	3761.5	0.0494934
RSb14	93	13.9	65	358000	7.7	0.497018	33846.9	305.015	0.00447892
RSb14	94	14.3	65.2	367000	7.7	0.595829	41946.4	0	0
RSb14	95	15.3	65.2	401000	8	0.697211	52151.4	0	0
RSb14	96	14.1	65.4	395000	7.9	0.795229	54870.8	0	0
RSb14	97	12.9	64.9	409000	7.9	0.8	50880	0	0
RSb14	98	14.4	65.3	458000	8.1	0.9	63270	0	0
RSb14	99	14.5	65.3	474000	8.1	0.9	63720	0	0
RSb14	100	14.9	65.3	450000	8.2	1.1	79750	0	0
RMe14	-1	13.6	69.6	426000	8.1	1.09562	67709.2	0	0
RMe14	1	13.1	70.2	245000	9.2	1.46341	87073.2	0	0
RMe14	2	14.6	71.4	434000	8.3	1.27326	82125.4	0	0
RMe14	3	14.4	70.9	388000	8.6	1.49105	97365.8	0	0
RMe14	4	12.5	70.4	362000	8.2	2.15264	121840	0	0
RMe14	5	13	71.9	390000	8.2	2.0751	122846	0	0
RMe14	6	12.8	70.7	464000	7.8	1.6683	96928.4	0	0
RMe14	7	12.2	69.8	381000	8.6	3.4965	195804	0	0
RMe14	8	13	71.7	456000	8.6	2.20729	128464	0	0
RMe14	9	13.9	69.8	357000	8.6	3.9604	248713	0	0
RMe14	10	13	71.9	362000	8.4	3.51906	205865	41	0.000700855
RMe14	11	13.7	71.7	412000	8.8	2.98805	184960	102.087	0.00164922
RMe14	12	15.1	71.5	355000	8.1	4.25743	289505	308.078	0.00453056
RMe14	13	13.5	69.8	345000	8.2	4.31034	262500	326.372	0.00535915
RMe14	14	15	70.3	318000	7.9	4.16667	284167	6463.1	0.0947668
RMe14	15	13.2	70.3	321000	7.1	1.08911	66108.9	15700.9	0.258663
RMe14	16	13	70.6	253000	7.2	1.69661	101118	60759.3	1.01945
RMe14	17	12.7	71	221000	7.5	1.58416	91722.8	113614	1.96224
RMe14	18	12.9	70.8	209000	8.1	1.76991	104602	188221	3.18479
RMe14	19	10.8	69.3	135000	9.3	2.53906	124414	309365	6.31357
RMe14	20	10.2	68.4	107000	7.3	1.67323	78641.7	227105	4.83202
RMe14	21	7.7	68.3	108000	7.2	2.53659	91317.1	33892.1	0.941448
RMe14	22	6.1	68.6	135000	8.4	3.1968	91428.6	145.9	0.0051014
RMe14	23	9.3	71.5	321000	8.2	3.16206	133123	0	0
RMe14	24	11.9	72.5	522000	8.1	5.5666	294473	0	0
RMe14	25	9.9	71.9	533000	7	7.47012	334661	40.1915	0.000897132
RMe14	26	10.4	71.2	653000	7	6.47619	301790	281.924	0.00604987
RMe14	27	12.4	72.4	664000	7.4	8.08679	448008	0	0
RMe14	28	11.5	72.2	573000	7.2	4.28287	221853	0	0
RMe14	29	13.4	71.8	594000	7.9	3.4965	211538	0	0
RMe14	30	13.1	71.9	536000	7.2	1.96271	115800	0	0
RMe14	31	14	72.6	537000	7.8	2.25049	141781	0	0
RMe14	32	13.3	71.1	477000	8.1	3.7962	227772	0	0
RMe14	33	13.4	71.8	458000	8.3	4.66733	285174	0	0
RMe14	34	13.2	71.6	448000	8.1	2.91545	174344	0	0
RMe14	35	13.1	72	424000	8.3	2.5974	154805	0	0
RMe14	36	14.7	72.2	429000	8.3	2.85433	189242	0	0
RMe14	37	13.5	71.4	389000	8.8	3.0572	184961	0	0
RMe14	38	14.7	71.4	376000	8.3	2.17606	144273	0	0
RMe14	39	14.3	71.7	334000	8.3	2.84035	183203	0	0
RMe14	40	13.8	71.9	324000	8.3	1.09344	67902.6	0	0
RMe14	41	14.8	72.1	298000	8.3	1.1988	79960	0	0
RMe14	42	15.4	72.8	268000	8.6	1.49402	103685	0	0
RMe14	43	14.7	72.2	234000	8.8	1.28968	84732.1	0	0
RMe14	44	14.3	71.8	443100	8.7	1.28458	83112.6	0	0
RMe14	45	14.2	71.1	251000	8.8	1.4985	96953	0	0
RMe14	46	15.1	71.7	289000	8.7	1.38203	93978.3	0	0
RMe14	47	14.4	71.3	344000	8	1.67488	109369	0	0
RMe14	48	14.6	72.5	410700	8.6	1.28458	84525.7	0	0
RMe14	49	13.6	71.4	348000	8	1.38203	84856.9	0	0
RMe14	50	15.3	72.2	283000	8.7	1.48515	101584	0	0
RMe14	51	14.1	71.2	398000	8.6	1.77165	112677	0	0
RMe14	52	13.9	71.8	377000	8.6	1.59046	99085.5	0	0
RMe14	53	13.5	72.5	418000	8.4	1.38203	84304	0	0
RMe14	54	14.6	73	329000	8.9	0.999001	65434.6	0	0
RMe14	55	14.1	72	367000	8.4	1.19641	75373.9	0	0
RMe14	56	15	73.2	407000	8.5	1.29225	86322.1	0	0
RMe14	57	13.5	71.5	372000	9.1	1.18694	72284.9	0	0
RMe14	58	14.2	71.7	388000	8.7	0.795229	50497	0	0
RMe14	59	14.4	70.2	413700	8.9	0.893744	57735.8	0	0
RMe14	60	15.2	71.5	418000	8.8	0.992063	68055.6	0	0
RMe14	61	13.8	71.8	357000	8.7	1.18694	73827.9	0	0
RMe14	62	14.6	71.7	370000	8.8	1.28458	84525.7	0	0
RMe14	63	12.6	70.5	355000	8.1	1.18694	66943.6	0	0
RMe14	64	15.1	71.3	409000	8.9	1.08911	74712.9	0	0
RMe14	65	13.6	71.2	341000	8.7	0.697906	42921.2	0	0
RMe14	66	15.2	71.4	332000	8.8	0.799201	54825.2	0	0
RMe14	67	14	71.3	345000	8.4	0.996016	63147.4	0	0
RMe14	68	13	72	299000	8.5	1.38614	82613.9	0	0
RMe14	69	13.5	71.2	318000	8.5	1.57635	97418.7	0	0
RMe14	70	13.9	71.3	395000	8.3	1.38203	86653.5	0	0
RMe14	71	14.3	71.4	348000	8.7	0.992063	63888.9	0	0
RMe14	72	14.7	70.9	365000	8.5	1.18812	78297	0	0
RMe14	73	14.1	71.1	380000	8.6	0.890208	56795.3	0	0
RMe14	74	14.6	71.1	341000	8.9	0.988142	65415	0	0
RMe14	75	14.4	70.2	347000	8.9	0.791296	52067.3	0	0
RMe14	76	12.9	68.9	338100	8.4	0.695825	40497	0	0
RMe14	77	13.4	70.3	258000	9.2	0.597015	36059.7	0	0
RMe14	78	15	71.1	387000	8.9	0.697211	46852.6	0	0
RMe14	79	14.3	70.7	400000	8.1	0.598205	38464.6	0	0
RMe14	80	14.6	71.1	351000	8.5	0.799201	52907.1	114.429	0.00172853
RMe14	81	14.2	71.1	338000	8.7	0.597015	38447.8	913.204	0.0141802
RMe14	82	14	70.1	249000	8.4	0.695825	44672	1107.37	0.0172487
RMe14	83	13.8	70.5	298000	8.1	0.794439	49890.8	11583.9	0.184458
RMe14	84	13.9	69.2	316000	7.7	0.992063	63095.2	8368.21	0.131576
RMe14	85	13.8	68.5	256000	7.9	1.18812	74851.5	11387.6	0.180756
RMe14	86	12.2	69.2	208000	7.9	0.994036	55864.8	7161.05	0.127421
RMe14	87	12.7	69.5	209000	7.5	1.9861	114598	4706.02	0.0815601
RMe14	88	11.8	68.8	236000	8.1	2.05882	112618	200.078	0.00365773
RMe14	89	11	68.2	277000	7.1	2.15475	109246	53.3208	0.00105169
RMe14	90	12.5	69.4	333900	8.4	3.47826	200000	0	0
RMe14	91	12.5	68.5	182000	9.2	3.66442	212170	10	0.000172712
RMe14	92	12.9	69.8	393000	8	1.97044	117438	22	0.000369128
RMe14	93	17.1	69.3	577000	8.3	1.08911	85277.2	0	0
RMe14	94	14.7	69.3	405000	8.8	1.18227	79330	0	0
RMe14	95	14.1	69.8	441000	8.4	2.62136	169078	0	0
RMe14	96	13.3	69.7	420000	8.3	1.47929	89201.2	0	0
RMe14	97	11.4	69.7	423000	7.7	1.9	99180	0	0
RMe14	98	12.8	70.1	447000	8.1	1.8	105300	0	0
RMe14	99	13	68.6	387000	8.4	2	118400	0	0
RMe14	100	13.4	69.5	378000	8.4	1.8	110160	0	0
RIc14	-1	13.6	73.4	306000	9.3	1.57635	93320.2	0	0
RIc14	1	16.6	73.8	251000	9.7	1.1846	84935.8	0	0
RIc14	2	17.9	73.9	369000	9.4	0.893744	69622.6	0	0
RIc14	3	17.3	74.5	303000	9.3	1.07108	79581.3	0	0
RIc14	4	16.8	75.1	226000	9.3	1.07527	76774.2	0	0
RIc14	5	17	75.4	302000	8.7	1.29741	95359.3	0	0
RIc14	6	17.5	74.9	370000	9.5	1.39165	105626	0	0
RIc14	7	14.7	74.3	276000	9.6	1.68484	107998	0	0
RIc14	8	14	74.2	271000	9.7	0.992063	60119	0	0
RIc14	9	17.3	72.9	235000	9.5	2.38777	179322	0	0
RIc14	10	14.7	74.8	307000	8.9	2.49252	158524	0	0
RIc14	11	14	74.8	255000	9.9	2.51938	152171	27.8019	0.000460296
RIc14	12	17	75	280000	9.2	2.29541	169172	238.79	0.00324002
RIc14	13	15.3	73.6	224700	9.2	1.76991	116991	282.943	0.00428053
RIc14	14	17.3	72.7	213000	8.7	2.59222	193639	8731.63	0.116889
RIc14	15	14.5	73.8	134000	10.1	1.47929	94230.8	57863.9	0.908382
RIc14	16	14.5	73.7	205800	9.2	2.0979	131748	200509	3.19282
RIc14	17	14.8	73.2	210200	10.3	1.38203	89141.2	194023	3.00811
RIc14	18	14	74.1	100000	10	1.18694	72640.9	305636	4.99406
RIc14	19	13.8	73.2	88000	9.7	0.892857	54553.6	269962	4.41836
RIc14	20	13.2	74.4	92000	9.3	1.19284	69423.5	145948	2.5077
RIc14	21	10.3	71.9	122000	9.1	2.08748	96858.8	53258	1.1478
RIc14	22	12.2	73.4	279000	8.4	3.75723	204017	8970.76	0.165207
RIc14	23	11.8	73.3	436000	8.1	3.52941	183176	13373.3	0.257674
RIc14	24	12.3	75.6	500000	7.7	8.47953	447719	114589	2.17024
RIc14	25	12.8	73.2	509000	7.3	5.72557	325212	131035	2.30696
RIc14	26	9.9	72.1	358000	6.9	8.14815	360148	14339.2	0.324416
RIc14	27	11.3	73.6	315000	7.3	3.84986	192878	0	0
RIc14	28	12	73.7	313000	7.7	5.77478	305486	0	0
RIc14	29	14.2	75.1	300000	9.1	8.2505	519781	0	0
RIc14	30	13.7	73.4	370000	8.5	8.60735	531934	0	0
RIc14	31	13.9	74	311000	9.1	6.9723	435072	0	0
RIc14	32	13.3	73.6	439000	8.8	7.09492	432081	0	0
RIc14	33	12.8	72.5	348000	9.1	5.66406	329648	0	0
RIc14	34	13.3	73.3	349000	8.8	4.96592	296465	0	0
RIc14	35	12.6	71.6	252000	8.8	4.03458	234409	0	0
RIc14	36	12	73.3	363000	8.9	3.7962	208032	0	0
RIc14	37	13.9	71.7	352000	8.7	2.36686	152426	0	0
RIc14	38	14.5	71	326000	9.5	3.48953	239033	0	0
RIc14	39	14.2	71	311000	8.9	2.39044	157530	0	0
RIc14	40	15.2	70.8	356000	8.6	1.7769	127404	0	0
RIc14	41	13.9	71	348000	8.6	1.96271	128165	0	0
RIc14	42	14.6	70.6	390800	8.8	1.38203	93287.3	0	0
RIc14	43	13.8	71.2	352000	8.6	1.28458	82984.2	0	0
RIc14	44	15.8	70.5	447000	8.1	1.57171	115835	0	0
RIc14	45	15.4	71.2	339000	8.4	1.87377	132663	0	0
RIc14	46	13.9	71.5	290800	8.3	1.57635	102305	0	0
RIc14	47	13.9	71.6	387000	8.4	1.09127	71041.7	0	0
RIc14	48	15.1	71.4	386000	8.7	1.66994	118399	0	0
RIc14	49	14.2	71.5	350000	8.8	1.67323	110433	0	0
RIc14	50	15.1	72.3	327000	9.2	2.07101	143728	0	0
RIc14	51	16	71.3	344000	8.9	1.87747	136868	0	0
RIc14	52	14.8	71.1	260000	8.6	1.78042	121246	0	0
RIc14	53	15.3	71.5	283500	9.3	1.67323	116457	26.9202	0.000386785
RIc14	54	15.5	71.7	263000	9.2	0.992063	70337.3	101.722	0.00143473
RIc14	55	15.2	71.8	196200	8.7	1.3986	95524.5	222.086	0.00325163
RIc14	56	15.1	70.6	230000	8.8	1.57635	111133	988.466	0.0140208
RIc14	57	14.3	70.7	208000	9.4	0.597015	38985.1	623.939	0.00955496
RIc14	58	15.8	70.2	197000	9.4	0.99108	72547.1	33.124	0.000452513
RIc14	59	16.4	70.3	163000	8.8	0.695825	52743.5	56.9457	0.000751263
RIc14	60	14.9	71.4	210000	9.1	0.899101	61408.6	23.1531	0.000338991
RIc14	61	15.8	70.8	245100	9.7	0.892857	64553.6	0	0
RIc14	62	14.5	70.9	279000	9.2	1.39165	92683.9	0	0
RIc14	63	13.2	70.4	270000	8.9	0.999001	60439.6	0	0
RIc14	64	14.3	71.7	237300	9.2	0.796813	53147.4	0	0
RIc14	65	14.6	71.1	308000	8.4	0.892857	60089.3	0	0
RIc14	66	14.5	70.6	292000	9.2	0.996016	67231.1	0	0
RIc14	67	15.6	70.3	344000	8.9	1.19641	86380.9	0	0
RIc14	68	16.4	71.1	372000	9.3	0.993049	75074.5	0	0
RIc14	69	15.3	70.9	368000	9.3	1.28458	90691.7	0	0
RIc14	70	15.6	70.9	362000	8.7	0.99108	71456.9	0	0
RIc14	71	16.2	71	317000	8.9	0.799201	59460.5	0	0
RIc14	72	15.5	69.9	365000	8.8	0.897308	64157.5	0	0
RIc14	73	17.1	69.4	378000	9.3	0.796813	62868.5	0	0
RIc14	74	16.5	71	362000	9.2	0.898204	67994	0	0
RIc14	75	16.5	70.4	344000	9.2	1.08911	83099	0	0
RIc14	76	12.9	68.5	300000	8.8	0.794439	47984.1	0	0
RIc14	77	14.5	70.2	274000	9.1	0.891089	59970.3	0	0
RIc14	78	15.8	70.1	299000	8.9	0.79602	57631.8	0	0
RIc14	79	15.8	69.9	250000	9.1	0.899101	66623.4	0	0
RIc14	80	15.5	70.7	336000	8.9	0.996016	71015.9	0	0
RIc14	81	16.2	69.7	315000	8.9	0.892857	66428.6	0	0
RIc14	82	14.7	69.5	297000	8.8	0.792079	53940.6	0	0
RIc14	83	15	69.8	270900	9.3	0.791296	54282.9	102.233	0.00149027
RIc14	84	16.5	70	255000	8.6	0.891089	67099	202.075	0.0026836
RIc14	85	16	70	286000	8.7	1.08374	81064	782.827	0.0104656
RIc14	86	16.6	69.1	302000	8.8	0.891089	69148.5	846.216	0.0109048
RIc14	87	15.8	69.9	253000	8.6	0.796813	57768.9	134.666	0.00185746
RIc14	88	14.1	68.8	296700	8.8	1.29225	83866.8	17.8405	0.000274892
RIc14	89	12.9	67.4	253000	8.8	1.57635	94108.4	0	0
RIc14	90	14.4	69.1	279000	9.3	0.992063	65873	0	0
RIc14	91	16.8	69.2	230000	9.3	1.57635	122483	0	0
RIc14	92	15.5	70.1	340000	8.7	1.39442	99840.6	0	0
RIc14	93	14.2	69	310000	9.1	0.992063	65873	0	0
RIc14	94	16.7	69.1	301000	9.4	1.28079	98620.7	0	0
RIc14	95	14.7	69.7	313000	9.1	2.18471	148123	0	0
RIc14	96	14.9	69.1	311000	9.1	0.996016	68725.1	0	0
RIc14	97	13	69.3	314000	9.3	1.5	89100	0	0
RIc14	98	16.1	70	320000	9.2	0.9	66420	0	0
RIc14	99	15.6	69	312000	9.1	1.3	93600	0	0
RIc14	100	15.8	69.9	256000	8.8	1	72400	0	0
RFv13	-1	12.8	67.1	439000	9.8	0.681597	42531.6	0	0
RFv13	1	13	67.8	464000	9.8	0.8867	55152.7	0	0
RFv13	2	14.2	67.5	493000	9.7	0.697211	47689.2	0	0
RFv13	3	14.2	68	441000	9.7	0.690335	47633.1	0	0
RFv13	4	14.2	68.1	402000	10	0.869565	60000	0	0
RFv13	5	15.1	69.2	466000	9.6	0.497018	35636.2	0	0
RFv13	6	14.1	68.3	411000	9.6	0.688976	46781.5	0	0
RFv13	7	14.6	68.8	423000	10.1	0.891972	63151.6	0	0
RFv13	8	13.6	67.7	380000	11.1	1.08374	72285.7	0	0
RFv13	9	13.8	66.9	384000	9.9	0.716846	47455.2	0	0
RFv13	10	13.7	68.5	395000	10.1	1.11008	73487.5	0	0
RFv13	11	13	68.3	345000	10.1	1.12945	70929.6	0	0
RFv13	12	13.9	69	380000	9.5	0.992063	66369	144.711	0.00216309
RFv13	13	14.3	69.1	404000	10.1	1.39581	96869.4	188.543	0.00271676
RFv13	14	14.4	68.7	302000	10	0.993049	69116.2	2329.37	0.0334679
RFv13	15	14.3	68.3	352000	9.3	0.695825	47942.3	27529.1	0.399551
RFv13	16	14.7	68.5	276000	9.2	0.496524	35203.6	209891	2.96039
RFv13	17	14.5	68.1	243000	9.4	0.79602	55562.2	323181	4.6301
RFv13	18	13.6	68.5	189000	9.6	1.18694	77151.3	761702	11.7185
RFv13	19	13	68.3	159600	9.2	1.19641	72861.4	1.21484e+06	19.9481
RFv13	20	10.8	67.2	221500	10	0.695825	34860.8	752094	15.0119
RFv13	21	8.7	65.9	78000	9.7	0.59761	25338.6	519002	12.2406
RFv13	22	6.8	63.6	114000	9.6	0.990099	33762.4	18028.8	0.528703
RFv13	23	8.1	71.5	205000	10	4.7952	168312
RFa14	-1	12.9	73.4	378000	9.3	1.19048	66547.6	0	0
RFa14	1	12.7	73.9	310000	9.2	0.877193	48421.1	0	0
RFa14	2	15.2	74.1	369000	9.2	1.07632	71144.8	0	0
RFa14	3	13.7	74.3	364000	9.2	0.885827	53149.6	0	0
RFa14	4	14.5	75.3	420000	8.9	0.895522	56865.7	0	0
RFa14	5	13.3	76.1	378000	8.8	1.49701	86976	0	0
RFa14	6	16	74.8	421000	9.1	1.28458	89535.6	0	0
RFa14	7	13.9	74.7	394000	9.5	1.07843	66215.7	0	0
RFa14	8	14.9	74.7	398000	9.8	0.794439	51161.9	0	0
RFa14	9	14.4	73	383000	9.5	1.44509	92052	0	0
RFa14	10	14	75.4	347000	9.4	1.70293	104049	0	0
RFa14	11	13.3	74.8	327000	10.2	2.48756	144776	0	0
RFa14	12	14.2	74.3	366000	9.2	1.91571	120115	271.097	0.00432372
RFa14	13	13.2	73.8	322000	8.8	2.35525	135898	524.082	0.00908288
RFa14	14	13.9	74.7	295000	8.6	1.87008	113888	5911.71	0.0970724
RFa14	15	12.8	74.2	258000	8.7	1.38203	77117.5	46436	0.832186
RFa14	16	13.2	73.1	176000	9.5	1.38477	80455	205856	3.54313
RFa14	17	15.3	74.2	187000	8.7	1.57635	105458	358956	5.36556
RFa14	18	11.2	73	125000	9.4	0.695825	33886.7	379140	7.78521
RFa14	19	10.9	74.2	143000	10	2.08127	102398	1124.21	0.0228497
RFa14	20	10.5	73.7	223000	10.1	1.96271	91462.2	70.105	0.0015044
RFa14	21	9.3	74.4	303000	8.8	5.66038	232642	0	0
RFa14	22	9.7	76.1	500000	8.6	6.58026	279661	0	0
RFa14	23	10.9	76.6	731000	8.5	9.83755	466300	0	0
RFa14	24	12.2	76	822000	8.7	10.495	552040	1596.33	0.0303485
RFa14	25	11.4	75.5	735000	8.2	7.29858	357630	8703.68	0.177626
RFa14	26	10.6	73.5	649000	7.7	4.89716	232125	64852.6	1.3682
RFa14	27	11.8	75.4	439000	8.1	3.1746	163810	140.4	0.00272093
RFa14	28	9.8	74.7	357000	8.2	2.99103	128913	0	0
RFa14	29	13.4	74.1	323000	9.9	4.12668	245537	0	0
RFa14	30	11.4	74.4	391000	8.8	3.57143	181786	0	0
RFa14	31	11.6	74	512000	8.9	3.75723	192746	0	0
RFa14	32	11.1	75.2	520000	8.7	5.42406	266321	0	0
RFa14	33	11.8	75.4	479000	9.1	5.64916	299970	0	0
RFa14	34	12.4	75.7	566000	8.7	7.92079	443564	0	0
RFa14	35	12.2	73.9	406000	9.4	4.31373	235961	0	0
RFa14	36	12.7	74.6	407000	8.9	3.38308	192159	0	0
RFa14	37	13.4	73.6	412000	9.3	3.30739	194805	0	0
RFa14	38	13.1	74.1	401000	9.3	2.37624	138772	0	0
RFa14	39	15	74.6	362000	10.2	1.98216	132012	0	0
RFa14	40	13.3	74.2	427000	9.3	1.18694	70623.1	0	0
RFa14	41	14.2	74.7	409000	9.6	1.57635	98679.8	0	0
RFa14	42	14.2	75.3	373000	9.3	1.18812	74970.3	0	0
RFa14	43	13.8	75.4	358000	9.5	1.18694	72166.2	0	0
RFa14	44	14.1	74.6	387000	9.4	0.599401	37402.6	0	0
RFa14	45	13.8	74.5	313000	9.7	1.18577	72569.2	0	0
RFa14	46	14.6	75.6	341000	9.8	0.892857	57857.1	0	0
RFa14	47	13.9	74.8	347000	9.4	1.38751	84777	0	0
RFa14	48	13.3	75.4	273000	9.5	1.57635	93635.5	0	0
RFa14	49	14.7	74.5	322000	9.3	1.7769	114610	0	0
RFa14	50	14.6	73.8	354000	9.5	1.67323	111270	0	0
RFa14	51	14.6	74.6	396000	9.3	1.2884	82200.2	0	0
RFa14	52	15.3	74.9	378000	9.6	1.18812	75683.2	0	0
RFa14	53	13.5	75.1	350000	9.4	0.895522	53731.3	0	0
RFa14	54	14.7	73.7	325000	9.5	0.992063	63392.9	0	0
RFa14	55	13.7	75.1	357000	9.3	0.792864	47334	0	0
RFa14	56	14.5	76	365000	9.4	0.794439	50764.6	0	0
RFa14	57	14.2	75.7	343000	9.6	1.08911	67851.5	0	0
RFa14	58	14.5	73.5	392000	9.4	1.18694	76201.8	0	0
RFa14	59	14.3	73.9	350000	9.6	0.794439	49890.8	0	0
RFa14	60	13.3	74.6	337000	9.5	0.792864	47254.7	0	0
RFa14	61	13.3	75.1	333000	9.6	0.794439	46633.6	0	0
RFa14	62	13.5	75.1	342000	9.2	0.695825	41053.7	0	0
RFa14	63	13.7	73.7	239000	9.5	0.792864	48285.4	0	0
RFa14	64	13.2	73.4	264000	9.2	1.18577	69841.9	0	0
RFa14	65	15	74.9	322000	9.1	0.795229	52803.2	0	0
RFa14	66	13.6	73.8	330000	9.1	0.895522	54358.2	0	0
RFa14	67	14.1	74.4	322000	9.4	0.896414	55846.6	0	0
RFa14	68	13.4	74.6	349000	9.7	0.894632	53141.2	0	0
RFa14	69	13.7	74.8	410000	9.4	0.799201	49310.7	0	0
RFa14	70	12.5	74.1	399000	9.4	0.892857	49910.7	0	0
RFa14	71	14.1	74.8	482000	9.4	0.895522	56149.3	0	0
RFa14	72	15.1	72.9	327900	9.6	0.993049	65938.4	0	0
RFa14	73	13.9	73.4	384000	9.8	0.898204	54970.1	0	0
RFa14	74	14.9	74.3	416000	9.6	1.28332	85597.2	0	0
RFa14	75	15.2	74.5	450000	9.7	0.892857	60267.9	0	0
RFa14	76	12.4	72	386000	9.5	0.893744	48887.8	0	0
RFa14	77	12.8	73.8	343000	9.8	0.795229	45566.6	0	0
RFa14	78	14.7	73.6	350000	10	0.992063	64781.7	0	0
RFa14	79	15.4	73.9	366000	10	0.796813	54342.6	0	0
RFa14	80	14	72.8	366000	9.6	0.895522	55791	0	0
RFa14	81	16.8	73.1	388000	9.5	1.09562	79870.5	0	0
RFa14	82	15	74.1	323000	9.7	0.997009	65603.2	0	0
RFa14	83	13.6	73.9	320000	9.4	0.896414	52888.4	0	0
RFa14	84	15.1	72.9	368000	9.4	0.897308	60299.1	0	0
RFa14	85	13.7	73.8	348000	9.3	0.993049	60774.6	0	0
RFa14	86	14.6	73	354000	9.6	0.894632	57972.2	0	0
RFa14	87	13.9	72.3	310000	9.9	0.891089	54534.7	0	0
RFa14	88	14	73.9	326000	9.7	0.792079	49584.2	0	0
RFa14	89	14.6	72.5	349000	9.9	0.796813	51633.5	0	0
RFa14	90	13.9	72.1	310000	10.1	0.697906	42642.1	0	0
RFa14	91	12.7	71	335000	9.6	0.695825	39522.9	0	0
RFa14	92	15.2	74.3	362000	9.6	0.59761	41055.8	0	0
RFa14	93	16	72.9	274000	9.7	0.697906	49272.2	0	0
RFa14	94	14.1	71.8	374000	9.2	0.693069	43732.7	0	0
RFa14	95	14.2	73.5	315000	9.7	0.695825	44045.7	50.4118	0.000796394
RFa14	96	14.6	73.6	363000	9.1	0.796813	52669.3	251.378	0.003803
RFa14	97	11.8	72.9	305000	9.2	1.3	69290	250.298	0.00469602
RFa14	98	13.3	73.6	306000	9.3	0.9	54180	3193.26	0.0530442
RFa14	99	13.2	73.2	277000	9.3	1.3	76310	1185.25	0.0201917
RFa14	100	13.9	72.1	255000	9.3	1.3	81640	9080.28	0.144591

## Sheet: Daily Activities
Day	NHP ID	Activity	Drugs Administered	Subject Manipulation
-1	RFa14	Time point 1	Ketamine	None
-1	RFv13	Time point 1	Ketamine	None
-1	RIc14	Time point 1	Ketamine	None
-1	RMe14	Time point 1	Ketamine	None
-1	RSb14	Time point 1	Ketamine	None
0	RFa14	Sporozoite Infection: Dose = 2000 spz/ml/monkey	Ketamine	None
0	RFv13	Sporozoite Infection: Dose = 2000 spz/ml/monkey	Ketamine	None
0	RIc14	Sporozoite Infection: Dose = 2000 spz/ml/monkey	Ketamine	None
0	RMe14	Sporozoite Infection: Dose = 2000 spz/ml/monkey	Ketamine	None
0	RSb14	Sporozoite Infection: Dose = 2000 spz/ml/monkey	Ketamine	None
1	RFa14		N/A	None
1	RFv13		N/A	None
1	RIc14		N/A	None
1	RMe14		N/A	None
1	RSb14		N/A	None
2	RFa14		N/A	None
2	RFv13		N/A	None
2	RIc14		N/A	None
2	RMe14		N/A	None
2	RSb14		N/A	None
3	RFa14		N/A	None
3	RFv13		N/A	None
3	RIc14		N/A	None
3	RMe14		N/A	None
3	RSb14		N/A	None
4	RFa14		N/A	None
4	RFv13		N/A	None
4	RIc14		N/A	None
4	RMe14		N/A	None
4	RSb14		N/A	None
5	RFa14		N/A	None
5	RFv13		N/A	None
5	RIc14		N/A	None
5	RMe14		N/A	None
5	RSb14		N/A	None
6	RFa14		N/A	None
6	RFv13		N/A	None
6	RIc14		N/A	None
6	RMe14		N/A	None
6	RSb14		N/A	None
7	RFa14		N/A	None
7	RFv13		N/A	None
7	RIc14		N/A	None
7	RMe14		N/A	None
7	RSb14		N/A	None
8	RFa14		N/A	None
8	RFv13		N/A	None
8	RIc14		N/A	None
8	RMe14		N/A	None
8	RSb14		N/A	None
9	RFa14		N/A	None
9	RFv13		N/A	None
9	RIc14		N/A	None
9	RMe14		N/A	None
9	RSb14		N/A	None
10	RFa14		N/A	None
10	RFv13		N/A	None
10	RIc14		N/A	None
10	RMe14		N/A	None
10	RSb14		N/A	None
11	RFa14		N/A	None
11	RFv13		N/A	None
11	RIc14		N/A	None
11	RMe14		N/A	None
11	RSb14		N/A	None
12	RFa14		N/A	None
12	RFv13		N/A	None
12	RIc14		N/A	None
12	RMe14		N/A	None
12	RSb14		N/A	None
13	RFa14		N/A	None
13	RFv13		N/A	None
13	RIc14		N/A	None
13	RMe14		N/A	None
13	RSb14		N/A	None
14	RFa14		N/A	None
14	RFv13		N/A	None
14	RIc14		N/A	None
14	RMe14		N/A	None
14	RSb14		N/A	None
15	RFa14		N/A	None
15	RFv13		N/A	None
15	RIc14		N/A	None
15	RMe14		N/A	None
15	RSb14		N/A	None
16	RFa14		N/A	None
16	RFv13		N/A	None
16	RIc14		N/A	None
16	RMe14		N/A	None
16	RSb14		N/A	None
17	RFa14		N/A	None
17	RFv13		N/A	None
17	RIc14		N/A	None
17	RMe14		N/A	None
17	RSb14		N/A	None
18	RFa14	Time point 2	Ketamine	Sub curative treatment Artemether
18	RFv13		N/A	None
18	RIc14		N/A	None
18	RMe14		N/A	None
18	RSb14		N/A	None
19	RFa14		N/A	None
19	RFv13		N/A	None
19	RIc14		N/A	None
19	RMe14		N/A	None
19	RSb14		N/A	None
20	RFa14		N/A	None
20	RFv13	Time point 2	Ketamine	None
20	RIc14		N/A	None
20	RMe14	Time point 2	Ketamine	Fluids support
20	RSb14		N/A	None
21	RFa14		N/A	None
21	RFv13		N/A	Sub curative treatment Artemether
21	RIc14	Time point 2	Ketamine	Sub curative treatment Artemether
21	RMe14		N/A	Sub curative treatment Artemether + Fluid support
21	RSb14	Time point 2	Ketamine	Sub curative treatment Artemether
22	RFa14		N/A	None
22	RFv13		N/A	Blood Transfusion ( donor : CF97)
22	RIc14		N/A	None
22	RMe14		N/A	Blood Transfusion ( donor : CG80)
22	RSb14		N/A	None
23	RFa14		N/A	None
23	RFv13	Time point 3 - Euthanasia	N/A	None
23	RIc14		N/A	None
23	RMe14		N/A	None
23	RSb14		N/A	None
24	RFa14		N/A	None
24	RFv13		N/A	None
24	RIc14		N/A	None
24	RMe14		N/A	None
24	RSb14		N/A	None
25	RFa14		N/A	None
25	RFv13		N/A	None
25	RIc14		N/A	None
25	RMe14		N/A	None
25	RSb14		N/A	None
26	RFa14	Time point 3	Ketamine	Blood-Stage Curative treatment Artemether- Day 1
26	RIc14	Time point 3	Ketamine	Blood-Stage Curative treatment Artemether- Day 1
26	RMe14	Time point 3	Ketamine	Blood-Stage Curative treatment Artemether- Day 1
26	RSb14	Time point 3	Ketamine	Blood-Stage Curative treatment Artemether- Day 1
27	RFa14		N/A	Blood-Stage Curative treatment Artemether- Day 2
27	RIc14		N/A	Blood-Stage Curative treatment Artemether- Day 2
27	RMe14		N/A	Blood-Stage Curative treatment Artemether- Day 2
27	RSb14		N/A	Blood-Stage Curative treatment Artemether- Day 2
28	RFa14		N/A	Blood-Stage Curative treatment Artemether- Day 3
28	RIc14		N/A	Blood-Stage Curative treatment Artemether- Day 3
28	RMe14		N/A	Blood-Stage Curative treatment Artemether- Day 3
28	RSb14		N/A	Blood-Stage Curative treatment Artemether- Day 3
29	RFa14		N/A	Blood-Stage Curative treatment Artemether- Day 4
29	RIc14		N/A	Blood-Stage Curative treatment Artemether- Day 4
29	RMe14		N/A	Blood-Stage Curative treatment Artemether- Day 4
29	RSb14		N/A	Blood-Stage Curative treatment Artemether- Day 4
30	RFa14		N/A	Blood-Stage Curative treatment Artemether- Day 5
30	RIc14		N/A	Blood-Stage Curative treatment Artemether- Day 5
30	RMe14		N/A	Blood-Stage Curative treatment Artemether- Day 5
30	RSb14		N/A	Blood-Stage Curative treatment Artemether- Day 5
31	RFa14		N/A	Blood-Stage Curative treatment Artemether- Day 6
31	RIc14		N/A	Blood-Stage Curative treatment Artemether- Day 6
31	RMe14		N/A	Blood-Stage Curative treatment Artemether- Day 6
31	RSb14		N/A	Blood-Stage Curative treatment Artemether- Day 6
32	RFa14		N/A	Blood-Stage Curative treatment Artemether- Day 7
32	RIc14		N/A	Blood-Stage Curative treatment Artemether- Day 7
32	RMe14		N/A	Blood-Stage Curative treatment Artemether- Day 7
32	RSb14		N/A	Blood-Stage Curative treatment Artemether- Day 7
33	RFa14		N/A	Blood-Stage Curative treatment Artemether- Day 8
33	RIc14		N/A	Blood-Stage Curative treatment Artemether- Day 8
33	RMe14		N/A	Blood-Stage Curative treatment Artemether- Day 8
33	RSb14		N/A	Blood-Stage Curative treatment Artemether- Day 8
34	RFa14		N/A	None
34	RIc14		N/A	None
34	RMe14		N/A	None
34	RSb14		N/A	None
35	RFa14		N/A	None
35	RIc14		N/A	None
35	RMe14		N/A	None
35	RSb14		N/A	None
36	RFa14		N/A	None
36	RIc14		N/A	None
36	RMe14		N/A	None
36	RSb14		N/A	None
37	RFa14		N/A	None
37	RIc14		N/A	None
37	RMe14		N/A	None
37	RSb14		N/A	None
38	RFa14		N/A	None
38	RIc14		N/A	None
38	RMe14		N/A	None
38	RSb14		N/A	None
39	RFa14		N/A	None
39	RIc14		N/A	None
39	RMe14		N/A	None
39	RSb14		N/A	None
40	RFa14		N/A	None
40	RIc14		N/A	None
40	RMe14		N/A	None
40	RSb14		N/A	None
41	RFa14		N/A	None
41	RIc14		N/A	None
41	RMe14		N/A	None
41	RSb14		N/A	None
42	RFa14		N/A	None
42	RIc14		N/A	None
42	RMe14		N/A	None
42	RSb14		N/A	None
43	RFa14		N/A	None
43	RIc14		N/A	None
43	RMe14		N/A	None
43	RSb14		N/A	None
44	RFa14		N/A	None
44	RIc14		N/A	None
44	RMe14		N/A	None
44	RSb14		N/A	None
45	RFa14		N/A	None
45	RIc14		N/A	None
45	RMe14		N/A	None
45	RSb14		N/A	None
46	RFa14		N/A	None
46	RIc14		N/A	None
46	RMe14		N/A	None
46	RSb14		N/A	None
47	RFa14		N/A	None
47	RIc14		N/A	None
47	RMe14		N/A	None
47	RSb14		N/A	None
48	RFa14		N/A	None
48	RIc14		N/A	None
48	RMe14		N/A	None
48	RSb14		N/A	None
49	RFa14		N/A	None
49	RIc14		N/A	None
49	RMe14		N/A	None
49	RSb14		N/A	None
50	RFa14		N/A	None
50	RIc14		N/A	None
50	RMe14		N/A	None
50	RSb14		N/A	None
51	RFa14		N/A	None
51	RIc14		N/A	None
51	RMe14		N/A	None
51	RSb14		N/A	None
52	RFa14		N/A	None
52	RIc14		N/A	None
52	RMe14		N/A	None
52	RSb14		N/A	None
53	RFa14		N/A	None
53	RIc14		N/A	None
53	RMe14		N/A	None
53	RSb14		N/A	None
54	RFa14		N/A	None
54	RIc14		N/A	None
54	RMe14		N/A	None
54	RSb14		N/A	None
55	RFa14		N/A	None
55	RIc14		N/A	None
55	RMe14		N/A	None
55	RSb14		N/A	None
56	RFa14		N/A	None
56	RIc14		N/A	None
56	RMe14		N/A	None
56	RSb14		N/A	None
57	RFa14		N/A	None
57	RIc14		N/A	None
57	RMe14		N/A	None
57	RSb14		N/A	None
58	RFa14		N/A	None
58	RIc14		N/A	None
58	RMe14		N/A	None
58	RSb14		N/A	None
59	RFa14		N/A	None
59	RIc14		N/A	None
59	RMe14		N/A	None
59	RSb14		N/A	None
60	RFa14		N/A	None
60	RIc14		N/A	None
60	RMe14		N/A	None
60	RSb14		N/A	None
61	RFa14		N/A	None
61	RIc14		N/A	None
61	RMe14		N/A	None
61	RSb14		N/A	None
62	RFa14		N/A	None
62	RIc14		N/A	None
62	RMe14		N/A	None
62	RSb14		N/A	None
63	RFa14	Time point 4	Ketamine	Blood-stage Curative treatment Artemether- Day 1
63	RIc14	Time point 4	Ketamine	Blood-stage Curative treatment Artemether- Day 1
63	RMe14	Time point 4	Ketamine	Blood-stage Curative treatment Artemether- Day 1
63	RSb14	Time point 4	Ketamine	Blood-stage Curative treatment Artemether- Day 1
64	RFa14		N/A	Blood-stage Curative treatment Artemether- Day 2
64	RIc14		N/A	Blood-stage Curative treatment Artemether- Day 2
64	RMe14		N/A	Blood-stage Curative treatment Artemether- Day 2
64	RSb14		N/A	Blood-stage Curative treatment Artemether- Day 2
65	RFa14		N/A	Blood-stage Curative treatment Artemether- Day 3
65	RIc14		N/A	Blood-stage Curative treatment Artemether- Day 3
65	RMe14		N/A	Blood-stage Curative treatment Artemether- Day 3
65	RSb14		N/A	Blood-stage Curative treatment Artemether- Day 3
66	RFa14		N/A	Blood-stage Curative treatment Artemether- Day 4
66	RIc14		N/A	Blood-stage Curative treatment Artemether- Day 4
66	RMe14		N/A	Blood-stage Curative treatment Artemether- Day 4
66	RSb14		N/A	Blood-stage Curative treatment Artemether- Day 4
67	RFa14		N/A	Blood-stage Curative treatment Artemether- Day 5
67	RIc14		N/A	Blood-stage Curative treatment Artemether- Day 5
67	RMe14		N/A	Blood-stage Curative treatment Artemether- Day 5
67	RSb14		N/A	Blood-stage Curative treatment Artemether- Day 5
68	RFa14		N/A	Blood-stage Curative treatment Artemether- Day 6
68	RIc14		N/A	Blood-stage Curative treatment Artemether- Day 6
68	RMe14		N/A	Blood-stage Curative treatment Artemether- Day 6
68	RSb14		N/A	Blood-stage Curative treatment Artemether- Day 6
69	RFa14		N/A	Blood-stage Curative treatment Artemether- Day 7
69	RIc14		N/A	Blood-stage Curative treatment Artemether- Day 7
69	RMe14		N/A	Blood-stage Curative treatment Artemether- Day 7
69	RSb14		N/A	Blood-stage Curative treatment Artemether- Day 7
70	RFa14		N/A	Blood-stage Curative treatment Artemether- Day 8
70	RIc14		N/A	Blood-stage Curative treatment Artemether- Day 8
70	RMe14		N/A	Blood-stage Curative treatment Artemether- Day 8
70	RSb14		N/A	Blood-stage Curative treatment Artemether- Day 8
71	RFa14		N/A	None
71	RIc14		N/A	None
71	RMe14		N/A	None
71	RSb14		N/A	None
72	RFa14		N/A	None
72	RIc14		N/A	None
72	RMe14		N/A	None
72	RSb14		N/A	None
73	RFa14		N/A	None
73	RIc14		N/A	None
73	RMe14		N/A	None
73	RSb14		N/A	None
74	RFa14		N/A	None
74	RIc14		N/A	None
74	RMe14		N/A	None
74	RSb14		N/A	None
75	RFa14		N/A	None
75	RIc14		N/A	None
75	RMe14		N/A	None
75	RSb14		N/A	None
76	RFa14	Time point 5	Ketamine	None
76	RIc14	Time point 5	Ketamine	None
76	RMe14	Time point 5	Ketamine	None
76	RSb14	Time point 5	Ketamine	None
77	RFa14		N/A	None
77	RIc14		N/A	None
77	RMe14		N/A	None
77	RSb14		N/A	None
78	RFa14		N/A	None
78	RIc14		N/A	None
78	RMe14		N/A	None
78	RSb14		N/A	None
79	RFa14		N/A	None
79	RIc14		N/A	None
79	RMe14		N/A	None
79	RSb14		N/A	None
80	RFa14		N/A	None
80	RIc14		N/A	None
80	RMe14		N/A	None
80	RSb14		N/A	None
81	RFa14		N/A	None
81	RIc14		N/A	None
81	RMe14		N/A	None
81	RSb14		N/A	None
82	RFa14		N/A	None
82	RIc14		N/A	None
82	RMe14		N/A	None
82	RSb14		N/A	None
83	RFa14		N/A	None
83	RIc14		N/A	None
83	RMe14		N/A	None
83	RSb14		N/A	None
84	RFa14		N/A	None
84	RIc14		N/A	None
84	RMe14		N/A	None
84	RSb14		N/A	None
85	RFa14		N/A	None
85	RIc14		N/A	None
85	RMe14		N/A	None
85	RSb14		N/A	None
86	RFa14		N/A	None
86	RIc14		N/A	None
86	RMe14		N/A	None
86	RSb14		N/A	None
87	RFa14		N/A	None
87	RIc14		N/A	None
87	RMe14		N/A	None
87	RSb14		N/A	None
88	RFa14		N/A	None
88	RIc14		N/A	None
88	RMe14		N/A	None
88	RSb14		N/A	None
89	RFa14		N/A	None
89	RIc14	Time point 6	Ketamine	Tuberculosis test
89	RMe14	Time point 6	Ketamine	Tuberculosis test
89	RSb14		N/A	None
90	RFa14		N/A	None
90	RIc14		N/A	None
90	RMe14		N/A	None
90	RSb14		N/A	None
91	RFa14	Time point 6	Ketamine	Tuberculosis test
91	RIc14		N/A	None
91	RMe14		N/A	None
91	RSb14	Time point 6	Ketamine	Tuberculosis test
92	RFa14		N/A	None
92	RIc14		N/A	None
92	RMe14		N/A	None
92	RSb14		N/A	None
93	RFa14		N/A	None
93	RIc14		N/A	None
93	RMe14		N/A	None
93	RSb14		N/A	None
94	RFa14		N/A	None
94	RIc14		N/A	None
94	RMe14		N/A	None
94	RSb14		N/A	None
95	RFa14		N/A	None
95	RIc14		N/A	None
95	RMe14		N/A	None
95	RSb14		N/A	None
96	RFa14		N/A	None
96	RIc14		N/A	None
96	RMe14		N/A	None
96	RSb14		N/A	None
97	RFa14	Time point 7	Ketamine	None
97	RIc14	Time point 7	Ketamine	None
97	RMe14	Time point 7	Ketamine	None
97	RSb14	Time point 7	Ketamine	None
98	RFa14		N/A	None
98	RIc14		N/A	None
98	RMe14		N/A	None
98	RSb14		N/A	None
99	RFa14		N/A	None
99	RIc14		N/A	None
99	RMe14		N/A	None
99	RSb14		N/A	None
100	RFa14		N/A	Curative treatment Chloroquine dose: 15mg/kg - Day 1
100	RIc14		N/A	Curative treatment Chloroquine dose: 15mg/kg - Day 1
100	RMe14		N/A	Curative treatment Chloroquine dose: 15mg/kg - Day 1
100	RSb14		N/A	Curative treatment Chloroquine dose: 15mg/kg - Day 1
101	RFa14		N/A	Curative treatment Chloroquine dose: 15mg/kg (Intramuscular) - Day 1
101	RIc14		N/A	Curative treatment Chloroquine dose: 15mg/kg (Intramuscular) - Day 1
101	RMe14		N/A	Curative treatment Chloroquine dose: 15mg/kg (Intramuscular) - Day 1
101	RSb14		N/A	Curative treatment Chloroquine dose: 15mg/kg (Intramuscular) - Day 1
102	RFa14		N/A	Curative treatment Chloroquine dose: 15mg/kg (Intramuscular) - Day 2
102	RIc14		N/A	Curative treatment Chloroquine dose: 15mg/kg (Intramuscular) - Day 2
102	RMe14		N/A	Curative treatment Chloroquine dose: 15mg/kg (Intramuscular) - Day 2
102	RSb14		N/A	Curative treatment Chloroquine dose: 15mg/kg (Intramuscular) - Day 2
103	RFa14		N/A	Curative treatment Chloroquine dose: 15mg/kg (Intramuscular) - Day 3
103	RIc14		N/A	Curative treatment Chloroquine dose: 15mg/kg (Intramuscular) - Day 3
103	RMe14		N/A	Curative treatment Chloroquine dose: 15mg/kg (Intramuscular) - Day 3
103	RSb14		N/A	Curative treatment Chloroquine dose: 15mg/kg (Intramuscular) - Day 3
104	RFa14		N/A	Curative treatment Primaquine dose: 1mg/kg (Palatable oral mixed with palatable food) - Day 1
104	RIc14		N/A	Curative treatment Primaquine dose: 1mg/kg (Palatable oral mixed with palatable food) - Day 1
104	RMe14		N/A	Curative treatment Primaquine dose: 1mg/kg (Palatable oral mixed with palatable food) - Day 1
104	RSb14		N/A	Curative treatment Primaquine dose: 1mg/kg (Palatable oral mixed with palatable food) - Day 1
105	RFa14		N/A	Curative treatment Primaquine dose: 1mg/kg (Palatable oral mixed with palatable food) - Day 2
105	RIc14		N/A	Curative treatment Primaquine dose: 1mg/kg (Palatable oral mixed with palatable food) - Day 2
105	RMe14		N/A	Curative treatment Primaquine dose: 1mg/kg (Palatable oral mixed with palatable food) - Day 2
105	RSb14		N/A	Curative treatment Primaquine dose: 1mg/kg (Palatable oral mixed with palatable food) - Day 2
106	RFa14		N/A	Curative treatment Primaquine dose: 1mg/kg (Palatable oral mixed with palatable food) - Day 3
106	RIc14		N/A	Curative treatment Primaquine dose: 1mg/kg (Palatable oral mixed with palatable food) - Day 3
106	RMe14		N/A	Curative treatment Primaquine dose: 1mg/kg (Palatable oral mixed with palatable food) - Day 3
106	RSb14		N/A	Curative treatment Primaquine dose: 1mg/kg (Palatable oral mixed with palatable food) - Day 3
107	RFa14		N/A	Curative treatment Primaquine dose: 1mg/kg (Palatable oral mixed with palatable food) - Day 4
107	RIc14		N/A	Curative treatment Primaquine dose: 1mg/kg (Palatable oral mixed with palatable food) - Day 4
107	RMe14		N/A	Curative treatment Primaquine dose: 1mg/kg (Palatable oral mixed with palatable food) - Day 4
107	RSb14		N/A	Curative treatment Primaquine dose: 1mg/kg (Palatable oral mixed with palatable food) - Day 4
108	RFa14		N/A	Curative treatment Primaquine dose: 1mg/kg (Palatable oral mixed with palatable food) - Day 5
108	RIc14		N/A	Curative treatment Primaquine dose: 1mg/kg (Palatable oral mixed with palatable food) - Day 5
108	RMe14		N/A	Curative treatment Primaquine dose: 1mg/kg (Palatable oral mixed with palatable food) - Day 5
108	RSb14		N/A	Curative treatment Primaquine dose: 1mg/kg (Palatable oral mixed with palatable food) - Day 5
109	RFa14		N/A	Curative treatment Primaquine dose: 1mg/kg (Palatable oral mixed with palatable food) - Day 6
109	RIc14		N/A	Curative treatment Primaquine dose: 1mg/kg (Palatable oral mixed with palatable food) - Day 6
109	RMe14		N/A	Curative treatment Primaquine dose: 1mg/kg (Palatable oral mixed with palatable food) - Day 6
109	RSb14		N/A	Curative treatment Primaquine dose: 1mg/kg (Palatable oral mixed with palatable food) - Day 6
110	RFa14		N/A	Curative treatment Primaquine dose: 1mg/kg (Palatable oral mixed with palatable food) - Day 7
110	RIc14		N/A	Curative treatment Primaquine dose: 1mg/kg (Palatable oral mixed with palatable food) - Day 7
110	RMe14		N/A	Curative treatment Primaquine dose: 1mg/kg (Palatable oral mixed with palatable food) - Day 7
110	RSb14		N/A	Curative treatment Primaquine dose: 1mg/kg (Palatable oral mixed with palatable food) - Day 7
125	RFa14		N/A	N/A
125	RIc14		N/A	N/A
125	RMe14		N/A	N/A
125	RSb14		N/A	N/A
132	RFa14		N/A	N/A
132	RIc14		N/A	N/A
132	RMe14		N/A	N/A
132	RSb14		N/A	N/A
134	RFa14		N/A	Curative treatment Chloroquine dose: 15mg/kg (Intramuscular) - Day 1
134	RIc14		N/A	Curative treatment Chloroquine dose: 15mg/kg (Intramuscular) - Day 1
134	RMe14		N/A	Curative treatment Chloroquine dose: 15mg/kg (Intramuscular) - Day 1
134	RSb14		N/A	Curative treatment Chloroquine dose: 15mg/kg (Intramuscular) - Day 1
135	RFa14		N/A	Curative treatment Chloroquine dose: 15mg/kg (Intramuscular) - Day 2
135	RIc14		N/A	Curative treatment Chloroquine dose: 15mg/kg (Intramuscular) - Day 2
135	RMe14		N/A	Curative treatment Chloroquine dose: 15mg/kg (Intramuscular) - Day 2
135	RSb14		N/A	Curative treatment Chloroquine dose: 15mg/kg (Intramuscular) - Day 2
136	RFa14		N/A	Curative treatment Chloroquine dose: 15mg/kg (Intramuscular) - Day 3
136	RIc14		N/A	Curative treatment Chloroquine dose: 15mg/kg (Intramuscular) - Day 3
136	RMe14		N/A	Curative treatment Chloroquine dose: 15mg/kg (Intramuscular) - Day 3
136	RSb14		N/A	Curative treatment Chloroquine dose: 15mg/kg (Intramuscular) - Day 3
137	RFa14		N/A	Curative treatment Primaquine dose: 2 mg/kg (Palatable oral crushed-mixed palatable food) - Day 1
137	RIc14		N/A	Curative treatment Primaquine dose: 2 mg/kg (Palatable oral crushed-mixed palatable food) - Day 1
137	RMe14		N/A	Curative treatment Primaquine dose: 2 mg/kg (Palatable oral crushed-mixed palatable food) - Day 1
137	RSb14		N/A	Curative treatment Primaquine dose: 2 mg/kg (Palatable oral crushed-mixed palatable food) - Day 1
138	RFa14		N/A	Curative treatment Primaquine dose: 2 mg/kg (Palatable oral crushed-mixed palatable food) - Day 2
138	RIc14		N/A	Curative treatment Primaquine dose: 2 mg/kg (Palatable oral crushed-mixed palatable food) - Day 2
138	RMe14		N/A	Curative treatment Primaquine dose: 2 mg/kg (Palatable oral crushed-mixed palatable food) - Day 2
138	RSb14		N/A	Curative treatment Primaquine dose: 2 mg/kg (Palatable oral crushed-mixed palatable food) - Day 2
139	RFa14		N/A	Curative treatment Primaquine dose: 2 mg/kg (Palatable oral crushed-mixed palatable food) - Day 3
139	RIc14		N/A	Curative treatment Primaquine dose: 2 mg/kg (Palatable oral crushed-mixed palatable food) - Day 3
139	RMe14		N/A	Curative treatment Primaquine dose: 2 mg/kg (Palatable oral crushed-mixed palatable food) - Day 3
139	RSb14		N/A	Curative treatment Primaquine dose: 2 mg/kg (Palatable oral crushed-mixed palatable food) - Day 3
140	RFa14		N/A	Curative treatment Primaquine dose: 2 mg/kg (Palatable oral crushed-mixed palatable food) - Day 4
140	RIc14		N/A	Curative treatment Primaquine dose: 2 mg/kg (Palatable oral crushed-mixed palatable food) - Day 4
140	RMe14		N/A	Curative treatment Primaquine dose: 2 mg/kg (Palatable oral crushed-mixed palatable food) - Day 4
140	RSb14		N/A	Curative treatment Primaquine dose: 2 mg/kg (Palatable oral crushed-mixed palatable food) - Day 4
141	RFa14		N/A	Curative treatment Primaquine dose: 2 mg/kg (Palatable oral crushed-mixed palatable food) - Day 5
141	RIc14		N/A	Curative treatment Primaquine dose: 2 mg/kg (Palatable oral crushed-mixed palatable food) - Day 5
141	RMe14		N/A	Curative treatment Primaquine dose: 2 mg/kg (Palatable oral crushed-mixed palatable food) - Day 5
141	RSb14		N/A	Curative treatment Primaquine dose: 2 mg/kg (Palatable oral crushed-mixed palatable food) - Day 5
142	RFa14		N/A	Curative treatment Primaquine dose: 2 mg/kg (Palatable oral crushed-mixed palatable food) - Day 6
142	RIc14		N/A	Curative treatment Primaquine dose: 2 mg/kg (Palatable oral crushed-mixed palatable food) - Day 6
142	RMe14		N/A	Curative treatment Primaquine dose: 2 mg/kg (Palatable oral crushed-mixed palatable food) - Day 6
142	RSb14		N/A	Curative treatment Primaquine dose: 2 mg/kg (Palatable oral crushed-mixed palatable food) - Day 6
143	RFa14		N/A	Curative treatment Primaquine dose: 2 mg/kg (Palatable oral crushed-mixed palatable food) - Day 7
143	RIc14		N/A	Curative treatment Primaquine dose: 2 mg/kg (Palatable oral crushed-mixed palatable food) - Day 7
143	RMe14		N/A	Curative treatment Primaquine dose: 2 mg/kg (Palatable oral crushed-mixed palatable food) - Day 7
143	RSb14		N/A	Curative treatment Primaquine dose: 2 mg/kg (Palatable oral crushed-mixed palatable food) - Day 7

## Sheet: Definitions
Term	Definition / Description
% Parasitemia	Calculated by the following formula: %parasitemia = parasites_per_uL * 100 / rbc_per_uL rbc = red blood cells measured as part of CBC (Complete Blood Count)
% Reticulocytes	# reticulocytes counted in thin smear/rbcs counted in thin smear x 100 rbc = red blood cells
Activity	Daily activities such as sporozoite infection, time point specimen collections, etc.
Day	Day count, relative to the day of sporozoite infection of the non-human primate which will be day zero
Drugs Administered	Drugs administered to non-human primates in addition anti-malarial treatments.
hgb	Hemoglobin, the amount of hemoglobin in non-human primate capillary blood in grams/deciliter at the time of specimen collection as part of CBC (Complete Blood Count)
mcv	Mean Corpuscular Volume (average volume of red blood cells) as part of CBC (Complete Blood Count) for non-human primate specimen in femtoliters
mpv	Mean Platelet Volume as part of CBC (Complete Blood Count) for non-human primate specimen in femtoliters
NHP_ID	Non-human primate subject identifier from Yerkes National Primate Research Center ARMS (Animal Resource Management System) Veterinary Database
Parasitemia	Parasitemia calculated as number of parasites per microliter (parasites/uL). This number is derived from either the thick smear reading or the thin smear reading. At high parasitemias, RBC counts derived from the CBC are used to calculate the number of parasites/ul based on parasite counts expressed as percentage of infected RBC on thin smears.
Parasites/uL	Parasite count per microliter as the average of the counts from the two readers.
plt	Platelets, number of platelets per microliter of non-human primate blood specimen as part of CBC (Complete Blood Count)
Reticulocytes	Reticulocytes are immature red blood cells, typically composing about 1% of the red cells in the human body. Reticulocytes develop and mature in the bone marrow and then circulate for about a day in the blood stream before developing into mature red blood cells. A reticulocyte count is a blood test that measures how fast reticulocytes are made by the bone marrow and released into the blood. The r…
Reticulocytes/uL	Total red blood cells from CBC (Complete Blood Count) x % reticulocytes/100
Subject Manipulation	Manipulations of non-human primate subjects including anti-malarial treatments,TB(Tuberculosis) test administered, etc.
Other Information
Blood-Stage Curative treatment Artemether	Drug administered following peak infection to clear blood-stage infections for observation of hypnozoite activation. Treatment Day 1: 4 mg/kg of non-human primate weight administered. Treatment Day 2 through Treatment Day 7: 2 mg/kg of non-human primate weight administered.
Curative treatment Chloroquine	Drug administered to clear infection following 100-day experiment. Day indicates time course of the curative treatment and is not relative to the day of sporozoite infection. Treatment Day 1 through Treatment Day 3: 15 mg/kg of non-human primate weight administered.
Curative treatment Primaquine	Drug administered to clear infection following 100-day experiment. Day indicates time course of the curative treatment and is not relative to the day of sporozoite infection. Treatment Day 1 through Treatment Day 7: (0.5 mg to 2 mg)/kg of non-human primate weight administered.
Sub Curative treatment Artemether	1 mg/kg of non-human primate weight administered to animals that developed clinical complications during acute infection.
Time points	Day of collection of venous whole blood and weight measurement. The non-human primates were anesthetized using Ketamine.
